# Supplementary material for: Using Pedigree and Genomic Data toward Better Management of Inbreeding in Italian Dairy Sheep and Goat Breeds
Source: MDPI journal article supplement (doi:10.3390/ani12202828), 2022-10-18
Supplement: s1 [file s1]

**Table S1.** Breed pedigree information: maximum number of fully (FullGen), total (MaxGen), and equivalent complete (EquiGen) traced generations, % of subjects with a complete first generation and with MaxGen equal to 1, and effective population size ( $N_e$ ).

| Species/Breed            | N.<br>subjects | Maximum<br>FullGen | Maximum<br>MaxGen | Maximum<br>EquiGen | Complete 1 <sup>st</sup><br>generation<br>(% subjects) | MaxGen =<br>1 (%<br>subjects) | $N_e$ |
|--------------------------|----------------|--------------------|-------------------|--------------------|--------------------------------------------------------|-------------------------------|-------|
| Camosciata<br>delle Alpi | 2093           | 6                  | 21                | 8.8                | 54.3                                                   | 8.8                           | 1745  |
| Saanen                   | 935            | 7                  | 23                | 10.4               | 55.0                                                   | 8.5                           | 2244  |
| Sarda                    | 1053           | 9                  | 40                | 12.8               | 52.8                                                   | 4.1                           | 50087 |
| Delle Langhe             | 104            | 9                  | 33                | 13.2               | 75.9                                                   | 1.2                           | 456   |
| Comisana                 | 529            | 7                  | 20                | 10.2               | 34.1                                                   | 15.8                          | 1229  |
| Massese                  | 371            | 8                  | 27                | 13.3               | 59.9                                                   | 9.2                           | 1381  |
